# Supplementary material for: LMSM: a modular approach for identifying lncRNA related miRNA sponge modules in breast cancer
Source: bioRxiv preprint, doi:10.1101/841502, version 2 (2020-02-25)
Supplement: S5 Data [file 841502_file11.xlsx]

## Sheet: Enrichment scores using WGCNA
Module ID	Basal	Basal	Basal	Basal	Basal	Basal	Basal	Basal	Basal	Basal	Basal	Basal	Basal	Basal	Basal	Basal	Basal	Basal	Basal	Basal	Basal	Basal	Basal	Basal	Basal	Basal	Basal	Basal	Basal	Basal	Basal	Basal	Basal	Basal	Basal	Basal	Basal	Basal	Basal	Basal	Basal	Basal	Basal	Basal	Basal	Basal	Basal	Basal	Basal
	TCGA-A2-A04U	TCGA-A2-A1G1	TCGA-A2-A25F	TCGA-A7-A0DA	TCGA-A7-A13D	TCGA-A7-A13E	TCGA-A7-A26F	TCGA-A7-A26G	TCGA-A7-A26I	TCGA-AC-A2BK	TCGA-AC-A2QH	TCGA-AN-A0AT	TCGA-AO-A12F	TCGA-AO-A1KR	TCGA-AR-A0TS	TCGA-AR-A1AH	TCGA-AR-A1AI	TCGA-AR-A1AJ	TCGA-AR-A1AO	TCGA-AR-A1AQ	TCGA-AR-A1AR	TCGA-AR-A1AY	TCGA-AR-A24Q	TCGA-AR-A251	TCGA-AR-A256	TCGA-AR-A2LR	TCGA-B6-A1KF	TCGA-BH-A0AV	TCGA-BH-A0BG	TCGA-BH-A0BL	TCGA-BH-A0BW	TCGA-BH-A0DL	TCGA-BH-A18G	TCGA-BH-A18Q	TCGA-BH-A18T	TCGA-BH-A18V	TCGA-BH-A1F0	TCGA-BH-A1F6	TCGA-BH-A1FC	TCGA-C8-A12V	TCGA-C8-A131	TCGA-C8-A134	TCGA-C8-A1HJ	TCGA-C8-A27B	TCGA-D8-A13Z	TCGA-D8-A142	TCGA-D8-A143	TCGA-D8-A147	TCGA-D8-A1JL
LMSM 1	0.305298	0.246594	0.236217	0.19061	0.215405	0.220152	0.230241	0.227972	0.221688	0.346219	0.245841	0.189375	0.216189	0.31248	0.142102	0.247972	0.293098	0.132463	0.154307	0.191881	0.189353	0.250218	0.16574	0.205633	0.304413	0.184338	0.316989	0.200961	0.169041	-0.194784	0.240898	0.200569	0.416324	0.160649	0.350071	0.204866	0.149474	0.188292	0.290548	0.124534	0.201409	0.179637	0.277124	0.336141	0.157838	0.167036	0.224801	0.169634	0.148113
LMSM 2	-0.226399	0.18549	0.332307	0.309554	0.269098	-0.293396	0.284014	0.43448	0.305292	-0.220931	0.389177	-0.271592	0.16202	-0.338291	0.157692	-0.307416	-0.359223	-0.129132	0.435916	-0.247956	-0.158045	0.15457	0.356955	-0.171718	-0.21686	0.35425	-0.236458	0.502011	-0.190452	0.465921	-0.242276	-0.353326	0.180779	-0.198713	-0.344682	-0.188226	0.296512	-0.219287	-0.353016	-0.170336	0.199693	-0.235619	-0.233543	-0.343988	0.198981	0.443609	-0.269385	-0.188745	0.227841
LMSM 3	-0.203121	0.236654	0.474184	-0.136459	0.146172	-0.21976	0.277955	0.176939	-0.136369	-0.257768	-0.197231	-0.151906	-0.263222	-0.183029	0.284711	-0.281017	0.26646	0.435626	0.410191	0.31555	0.249925	-0.201685	-0.183091	-0.167303	0.128626	-0.219902	-0.270129	0.164271	0.26235	0.283742	0.289982	0.297156	-0.159569	-0.17335	-0.165081	0.212745	0.446085	0.223718	0.211857	0.445578	0.145241	0.235354	-0.205593	0.252462	0.238343	0.158186	-0.171452	0.1697	0.309564
LMSM 4	-0.215755	-0.303922	-0.255651	-0.299374	-0.261641	-0.206576	-0.240429	-0.212899	-0.240739	-0.208737	-0.251873	-0.253626	-0.260041	-0.229299	-0.275785	-0.224964	-0.244788	-0.250883	-0.190694	-0.22115	-0.235004	-0.249255	-0.216604	-0.259833	-0.251683	-0.243177	-0.207442	-0.245961	-0.267791	-0.267706	-0.282203	-0.281524	-0.185567	-0.241126	-0.263306	-0.305477	-0.219985	-0.240568	-0.219935	-0.243693	-0.239323	-0.244431	-0.234384	-0.256077	-0.223828	-0.318108	-0.184866	-0.265585	-0.250102
LMSM 5	-0.180197	-0.260339	-0.384815	-0.231121	-0.210349	0.20611	-0.259748	-0.353012	-0.249358	-0.281184	-0.219373	-0.180634	-0.288857	-0.147116	-0.258885	-0.208288	-0.262085	-0.271591	-0.335215	-0.239779	-0.329552	-0.230315	-0.246659	-0.236837	-0.213106	-0.288957	0.19739	-0.248806	-0.233015	-0.346756	-0.244114	-0.196241	0.177383	-0.193903	-0.22587	-0.222272	-0.340689	0.192129	-0.212429	-0.309528	-0.166607	-0.236064	-0.203079	-0.266847	-0.24211	-0.276747	-0.171188	-0.243551	-0.29107
LMSM 6	-0.284152	-0.327536	0.467508	-0.293547	-0.273323	-0.457989	-0.20853	0.27825	-0.264227	-0.303035	0.291294	-0.406161	0.268659	-0.264638	0.217604	-0.381882	-0.43529	0.249843	0.591629	-0.291873	-0.107409	-0.318164	-0.145139	-0.250189	-0.398737	0.320862	-0.291443	-0.133125	-0.340618	0.367966	-0.374106	-0.315608	-0.421587	0.186143	-0.486407	-0.338568	0.510173	-0.25934	-0.458348	0.226652	-0.299719	-0.222024	-0.178698	-0.483258	-0.172931	0.201849	-0.260565	-0.415067	-0.199139
LMSM 7	-0.160336	-0.236882	-0.33645	-0.178163	-0.184027	0.176445	-0.175088	-0.271595	-0.228148	-0.16447	0.201286	0.252824	0.179573	-0.173024	-0.190158	-0.205002	0.164173	-0.171283	-0.194425	-0.172104	-0.353506	-0.204988	-0.211866	-0.285204	-0.23191	-0.19289	0.291405	-0.238141	0.208583	0.188657	0.199322	0.204832	0.180164	0.227476	-0.256129	0.225389	-0.284478	0.201623	-0.273602	-0.245219	0.239867	0.198127	0.160917	-0.154275	-0.240603	-0.254264	0.326194	0.131729	-0.205209
LMSM 8	0.319091	0.316861	0.214526	-0.201121	0.283912	0.206877	0.213968	0.139804	0.309445	0.409551	0.222364	0.425059	0.315686	0.31678	0.22511	0.34459	0.408649	0.293023	-0.236051	0.374325	0.36188	0.423273	0.308747	0.287312	0.389484	0.263259	0.362713	0.285543	0.180031	0.172811	0.134761	0.258465	0.206517	0.237497	0.460383	0.370094	0.176265	0.272945	0.445044	0.162203	0.276224	0.406308	0.42475	0.446391	0.363694	0.15194	0.470237	0.292628	0.228599
LMSM 9	-0.214682	-0.234995	-0.239977	-0.222623	-0.191105	-0.256538	-0.201372	-0.182616	-0.178288	0.179588	-0.298183	-0.210024	-0.236184	-0.243165	-0.285157	0.323159	-0.211815	-0.329329	-0.279619	-0.208021	0.190702	-0.16723	-0.195898	-0.254737	-0.197928	-0.270924	-0.165866	-0.20183	-0.187069	-0.27032	-0.176223	-0.269953	-0.218717	-0.251545	0.186689	-0.308241	-0.267426	-0.233539	-0.225318	-0.236354	-0.297527	-0.234717	-0.307421	-0.280478	-0.221214	-0.230194	-0.247765	-0.155737	-0.157746
LMSM 10	0.1582	-0.235244	-0.324787	-0.198461	-0.168505	-0.178148	-0.23928	-0.235782	-0.200852	-0.176708	-0.215226	0.160109	-0.238386	-0.188045	-0.259419	-0.16919	-0.193473	-0.259361	-0.253987	-0.195187	-0.225364	-0.17638	-0.171353	-0.183239	-0.183444	-0.240254	0.200533	0.166351	-0.201334	-0.306116	-0.211963	-0.226536	0.173525	-0.200607	-0.217434	-0.228875	-0.288995	-0.183139	-0.187142	-0.247806	-0.194828	-0.225602	0.144916	-0.152077	-0.178526	-0.255354	0.210237	0.164929	-0.180822
LMSM 11	-0.417299	-0.255055	-0.338666	-0.403066	-0.433111	-0.195938	-0.251134	-0.270286	-0.343756	-0.243081	-0.319333	-0.294092	-0.402008	-0.374294	-0.360366	-0.152469	-0.322427	-0.428713	-0.398069	-0.41741	-0.235065	-0.232488	-0.318911	-0.356083	-0.297556	-0.33745	-0.286012	-0.281671	-0.395332	-0.35955	-0.359567	-0.35691	-0.353738	-0.227193	-0.210465	-0.311281	-0.389972	-0.365107	-0.294126	-0.324367	-0.352882	-0.319804	-0.337316	-0.303487	-0.246675	-0.393743	-0.293359	-0.263048	-0.334019
LMSM 12	0.245363	-0.33861	-0.406769	-0.212171	-0.257598	-0.206331	-0.280807	-0.402683	-0.361602	-0.276008	-0.351127	-0.231202	-0.209933	-0.132645	-0.273307	-0.304366	-0.296549	-0.357257	-0.289781	-0.302449	-0.357278	-0.300155	-0.328524	-0.262594	-0.306006	-0.380596	-0.170691	-0.329706	-0.2609	-0.313986	-0.17919	-0.200972	-0.299218	-0.291919	-0.25913	-0.234638	-0.298433	-0.244452	-0.21463	-0.357215	-0.202263	-0.239483	-0.274468	-0.265782	-0.222316	-0.262014	0.183103	-0.1975	-0.232749
LMSM 13	0.359574	0.491455	-0.154244	0.510189	0.426645	0.476642	0.248101	0.395821	0.198442	0.455957	0.255049	0.410345	0.430786	0.324752	0.170043	-0.200932	-0.179	-0.388301	-0.500323	0.471617	0.259094	0.390963	0.551489	0.490452	0.5742	0.23737	0.67729	0.251642	0.561972	-0.422725	-0.253683	0.413746	-0.201333	0.306376	0.494407	0.491807	-0.276918	0.420262	0.616376	0.193754	0.579222	0.500748	0.618856	0.560281	-0.586086	0.374517	-0.412147	0.150402	0.338268
LMSM 14	-0.505119	0.557256	0.857926	-0.484497	-0.547345	-0.527245	0.432096	0.511164	-0.292	-0.529945	-0.404338	-0.108974	-0.535244	-0.304621	0.628218	-0.60243	0.635762	0.785943	0.737427	0.675535	0.593738	-0.502396	0.336694	-0.261855	-0.255977	-0.369041	-0.641517	-0.240195	0.555024	0.601122	0.556695	0.602413	-0.276957	0.113733	-0.348402	0.455567	0.76778	0.487785	0.598824	0.821311	-0.148091	0.439486	-0.332253	0.577209	0.493981	0.38154	0.168459	0.233828	0.603886
LMSM 15	-0.312113	-0.321723	-0.447985	0.352395	0.251668	0.422364	-0.279946	-0.307092	-0.226172	0.272131	0.263628	-0.141471	0.297161	0.307123	0.172596	-0.328475	-0.168476	-0.377303	-0.444279	0.266804	-0.414312	0.317454	-0.339014	-0.226391	-0.126882	-0.34679	0.389985	-0.30094	0.247348	-0.308446	-0.170054	0.282928	0.172296	-0.175025	0.386586	0.209082	-0.404213	0.433587	0.384714	-0.191797	0.508723	0.385765	-0.455109	0.403264	-0.403423	0.282215	-0.175365	-0.231905	-0.357554
LMSM 16	-0.370345	-0.286108	-0.415408	-0.440608	-0.416533	-0.370851	-0.240946	-0.230891	-0.363615	-0.290397	-0.380059	-0.309823	-0.474869	-0.436027	-0.420695	-0.252734	-0.30915	-0.450132	-0.468784	-0.457974	-0.253883	-0.329687	-0.396661	-0.27726	-0.23438	-0.411662	-0.259353	-0.411231	-0.342846	-0.481008	0.165787	-0.345998	-0.376731	-0.35537	-0.238142	-0.438617	-0.429843	-0.392542	-0.347023	-0.460091	-0.443459	-0.406253	-0.430189	-0.277346	-0.332366	-0.449974	-0.363221	-0.30417	-0.375494
LMSM 17	-0.240232	-0.428238	-0.448668	-0.317436	-0.319393	-0.266657	-0.38329	-0.443893	-0.389637	-0.390302	-0.297259	-0.308585	-0.376122	-0.172831	-0.336157	-0.378219	-0.355774	-0.376226	-0.391607	-0.326282	-0.465838	-0.261011	-0.287781	-0.313468	-0.366566	-0.360172	-0.23391	-0.313929	-0.295308	-0.413078	-0.336976	-0.369904	-0.322773	-0.280815	-0.322879	-0.335282	-0.460371	-0.354103	-0.275397	-0.402219	-0.286378	-0.365484	-0.355943	-0.332538	-0.286908	-0.3663	-0.198156	-0.283239	-0.290054
[truncated: 451 more columns]

## Sheet: Enrichment scores using SGFA
Module ID	Basal	Basal	Basal	Basal	Basal	Basal	Basal	Basal	Basal	Basal	Basal	Basal	Basal	Basal	Basal	Basal	Basal	Basal	Basal	Basal	Basal	Basal	Basal	Basal	Basal	Basal	Basal	Basal	Basal	Basal	Basal	Basal	Basal	Basal	Basal	Basal	Basal	Basal	Basal	Basal	Basal	Basal	Basal	Basal	Basal	Basal	Basal	Basal	Basal
	TCGA-A2-A04U	TCGA-A2-A1G1	TCGA-A2-A25F	TCGA-A7-A0DA	TCGA-A7-A13D	TCGA-A7-A13E	TCGA-A7-A26F	TCGA-A7-A26G	TCGA-A7-A26I	TCGA-AC-A2BK	TCGA-AC-A2QH	TCGA-AN-A0AT	TCGA-AO-A12F	TCGA-AO-A1KR	TCGA-AR-A0TS	TCGA-AR-A1AH	TCGA-AR-A1AI	TCGA-AR-A1AJ	TCGA-AR-A1AO	TCGA-AR-A1AQ	TCGA-AR-A1AR	TCGA-AR-A1AY	TCGA-AR-A24Q	TCGA-AR-A251	TCGA-AR-A256	TCGA-AR-A2LR	TCGA-B6-A1KF	TCGA-BH-A0AV	TCGA-BH-A0BG	TCGA-BH-A0BL	TCGA-BH-A0BW	TCGA-BH-A0DL	TCGA-BH-A18G	TCGA-BH-A18Q	TCGA-BH-A18T	TCGA-BH-A18V	TCGA-BH-A1F0	TCGA-BH-A1F6	TCGA-BH-A1FC	TCGA-C8-A12V	TCGA-C8-A131	TCGA-C8-A134	TCGA-C8-A1HJ	TCGA-C8-A27B	TCGA-D8-A13Z	TCGA-D8-A142	TCGA-D8-A143	TCGA-D8-A147	TCGA-D8-A1JL
LMSM 1	0.328036	0.396788	0.191211	0.275694	0.399254	0.319957	0.201963	0.222253	0.367181	0.252693	0.142276	0.258866	0.28564	0.213833	0.279332	0.344259	0.370489	0.42873	0.146258	0.3469	0.321539	0.480237	0.274839	0.221853	0.399576	0.225429	0.198882	0.185812	0.428572	0.313924	0.421289	0.20828	0.157149	0.270002	0.880348	0.388279	0.24737	0.1395	0.318092	0.343745	-0.233806	0.208514	0.281952	0.182694	0.246188	0.131831	0.167813	0.473655	0.370706
LMSM 2	-0.0835509	-0.2051	-0.177632	0.138513	-0.15266	-0.138279	-0.193703	-0.138441	-0.117243	0.224096	0.156155	-0.225589	0.123274	-0.0901096	0.1731	-0.100921	-0.224178	-0.200398	-0.139632	-0.209121	-0.165622	0.0974276	-0.151084	0.136636	-0.147945	0.214649	0.142766	0.116147	-0.21529	-0.165288	-0.168604	-0.247588	-0.0905421	-0.119192	-0.179206	-0.157625	-0.209021	-0.201477	-0.145195	-0.194385	-0.206659	-0.207438	-0.128118	-0.123233	-0.192779	-0.177106	0.151549	0.133493	-0.164268
LMSM 3	-0.286685	0.541393	0.16657	0.204086	-0.51272	-0.55455	0.437338	-0.329613	0.609024	0.408971	-0.559569	-0.323617	0.390842	-0.396917	-0.486216	0.57755	0.413899	-0.501575	0.125859	0.569555	0.163278	0.589916	0.228736	0.218672	0.240171	-0.514554	0.174888	-0.20949	-0.255931	0.36995	-0.258677	-0.35642	0.394468	-0.232467	-0.213816	-0.306105	-0.370057	0.323601	-0.236511	0.455783	-0.53327	-0.345927	0.302303	-0.505296	-0.680088	-0.304185	-0.484205	-0.218835	0.349713
LMSM 4	0.0999083	0.293027	0.203238	0.281408	0.344385	0.262711	0.270316	0.302561	0.222671	0.219927	0.176171	0.252568	0.136591	0.101928	0.257309	0.224824	0.276384	0.414868	0.266965	0.178921	0.232843	0.270609	0.146903	0.358102	0.362399	0.173696	0.23451	0.254301	0.432192	0.318488	0.941143	0.364909	0.148128	0.277634	0.28477	0.401592	0.376564	0.178832	0.205212	0.382719	0.146857	0.241664	0.225794	0.334968	0.118842	0.20614	0.159511	0.39362	0.260642
LMSM 5	0.353581	0.13381	-0.135761	0.257933	0.344022	0.305436	0.121744	0.159352	0.311762	0.283781	0.202523	0.105271	0.435605	0.87732	0.188733	0.416923	0.213467	0.224581	-0.142997	0.262455	0.183337	0.214458	0.214161	0.222595	0.205692	0.178844	0.319155	0.137141	0.148266	0.263189	0.111308	0.303307	0.313402	0.3071	0.235001	0.211845	0.109519	0.16473	0.149346	0.242116	0.210003	0.241125	0.344706	0.201837	0.136495	0.122666	0.18318	0.194433	0.203599
LMSM 6	0.267791	0.150528	-0.169658	0.349262	0.249581	0.925362	-0.120078	0.115831	0.252058	0.415776	0.188637	0.266402	0.236677	0.244662	0.341538	0.255778	0.175145	0.219181	0.13106	0.229863	0.208696	0.343736	0.295003	0.408066	0.28726	0.273611	0.321283	0.270769	0.260813	0.154855	0.240455	0.162413	0.213024	0.374318	0.256283	0.365664	0.14581	0.325104	0.328828	0.191824	0.189793	0.229666	0.238253	0.241091	0.167751	0.155713	0.199831	0.346827	0.215729
LMSM 7	-0.106056	-0.122688	-0.138002	-0.188482	0.105535	-0.128157	0.325071	0.212532	0.110038	0.11939	-0.134562	-0.136976	0.100856	0.105101	0.121304	0.122565	0.170762	-0.139648	0.175465	-0.100076	-0.170687	-0.152623	-0.23678	-0.129601	0.120475	-0.19994	0.147996	-0.11963	-0.202092	-0.139796	0.225855	0.135308	0.116605	-0.146674	0.106386	0.155671	0.172438	-0.141511	-0.140017	0.119602	0.29735	-0.117512	-0.140105	0.167279	0.288202	-0.117111	0.173419	-0.156398	0.196933
LMSM 8	0.187972	0.212405	0.108438	0.237826	0.184196	0.280478	0.350382	0.162184	0.215215	0.242308	0.225081	0.142074	0.261661	0.0877072	0.168051	0.196844	-0.0754987	0.164912	0.155534	0.102283	0.208269	0.216027	-0.19866	0.152883	0.0987833	0.237707	0.10012	0.252154	0.126147	0.282399	0.114879	0.286263	0.216611	0.234301	0.0757918	0.133869	-0.102448	0.118396	-0.100252	0.13905	0.448523	-0.0987463	0.261238	0.112641	0.985614	0.288571	0.520046	0.216608	0.211669
LMSM 9	0.286177	0.20379	0.159313	0.186866	0.258865	0.178711	0.278857	0.951165	0.253564	0.259531	0.274154	0.186485	0.217519	0.138955	0.182862	0.264989	0.283392	0.261643	0.293904	0.145668	0.141942	0.251077	0.267573	0.261534	0.420291	0.223427	0.283767	0.220631	0.234662	0.261066	0.319064	0.127028	0.25673	0.228544	0.186644	0.221203	0.27319	0.193933	0.148876	0.227181	0.247274	0.230766	0.310603	0.312687	0.220609	0.287559	0.231502	0.237008	0.311565
LMSM 10	0.252764	0.304089	0.162953	0.225478	0.294209	0.19233	0.363947	0.137925	0.245845	-0.0753938	0.184374	0.219402	-0.0875858	0.182861	0.175571	0.173594	0.226485	0.164374	0.274727	0.295957	0.114848	0.261087	0.127802	0.273884	0.182059	-0.161839	0.259965	0.211877	0.177204	0.235486	0.376361	0.361352	0.22991	0.144544	0.180952	0.289756	0.20679	0.274292	0.155075	0.148464	0.428473	0.15285	0.232591	0.217108	0.344679	0.253794	0.243198	0.198016	0.249899
LMSM 11	0.43	0.234289	0.295437	0.415074	0.374528	0.42092	0.204703	0.207591	0.362128	0.316962	0.307923	0.28722	0.211349	0.305423	0.302656	0.284492	0.33207	0.325099	0.149181	0.432364	0.246946	0.484695	0.263775	0.401448	0.364993	0.380409	0.376699	0.464759	0.417904	0.290597	0.298163	0.204277	0.351475	0.306235	0.390967	0.460897	0.298717	0.328646	0.906055	0.367074	0.166354	0.343124	0.310594	0.32013	0.340767	0.242662	0.227094	0.453787	0.403539
LMSM 12	0.187202	0.262026	0.221852	0.381614	0.286066	0.305484	0.22588	0.269516	0.297683	0.170344	0.323732	0.168805	0.247507	0.0917996	0.323777	0.190259	0.12726	-0.0833235	0.226612	0.18548	0.11486	0.309686	0.275297	0.296228	0.216268	0.46875	0.209552	0.319823	0.133953	0.33659	0.174039	0.135351	0.141039	0.417061	0.0936856	0.175025	0.336837	0.168077	0.15153	0.164087	0.174857	0.185272	0.227126	0.0965788	0.153933	0.34796	0.179625	0.274498	0.268936
LMSM 13	0.205469	0.282039	0.158044	0.423377	0.379792	0.37212	0.23068	0.331981	0.26713	0.242324	0.267027	0.363902	0.179897	0.170752	0.446298	0.186005	0.234226	0.191348	0.154568	0.11594	0.088098	0.336849	0.47051	0.439562	0.353658	0.329476	0.201988	0.4574	0.396519	0.24415	0.399137	0.243574	0.33181	0.364025	0.226092	0.392318	0.241325	0.331708	0.168516	0.27614	0.153774	0.345015	0.328072	0.35764	0.169223	0.312478	0.133669	0.422947	0.389054
LMSM 14	-0.164501	-0.254655	-0.192228	0.144465	-0.148613	0.197116	-0.157467	-0.194907	-0.184904	0.121343	-0.135662	0.121265	-0.14822	-0.199205	0.144474	-0.162111	-0.273347	-0.184468	-0.151259	-0.184595	-0.178284	0.161059	-0.185554	0.139253	-0.123059	0.17614	-0.188751	-0.205	-0.268053	-0.256344	-0.117774	-0.178096	-0.159547	-0.185522	-0.128955	0.139811	-0.248969	0.203397	-0.130494	-0.232474	-0.157632	-0.176354	-0.152445	-0.212198	0.165292	0.154191	-0.156399	-0.135277	-0.136663
LMSM 15	0.124706	0.145924	0.160354	0.200264	0.12195	-0.153437	0.130907	0.26198	0.233299	0.163086	0.211924	-0.227651	0.228986	-0.0864168	0.124071	0.21144	-0.180519	0.144973	0.504515	0.157778	-0.112673	0.291432	0.217347	-0.14119	0.166792	0.373379	0.202226	0.259792	-0.167104	0.359789	0.148989	-0.180665	0.200245	0.516433	-0.214782	0.136434	0.213849	-0.109495	-0.22185	0.294222	-0.255881	0.226498	0.151691	-0.173784	-0.195084	0.150961	-0.271172	0.191645	0.233772
LMSM 16	0.225752	0.298071	0.190714	0.197522	0.307851	0.122205	0.357803	0.272706	0.297571	0.266344	0.321087	0.27577	0.149809	0.0853913	0.109006	0.193382	0.101916	0.188356	0.331337	0.180745	0.159607	0.157049	0.0769355	0.282405	0.268742	0.181184	0.222239	0.276573	0.161129	0.220471	0.313907	0.36379	0.164491	0.129566	0.163088	0.199827	0.306047	0.135136	0.165008	0.0961747	0.229669	0.107804	0.223802	0.105105	0.236611	0.293637	0.249094	0.221472	0.216087
LMSM 17	-0.174698	-0.142994	-0.128365	-0.220407	-0.20532	-0.20971	-0.107998	0.122991	-0.27741	-0.174333	0.108805	-0.226923	-0.159479	-0.14257	-0.275853	-0.120008	-0.125501	-0.244007	-0.158482	-0.151555	-0.230214	-0.169946	-0.241064	-0.199368	-0.109726	-0.20797	-0.173672	-0.205815	-0.258636	-0.294825	0.167124	-0.174682	-0.106501	-0.179626	-0.111572	-0.250896	-0.253847	-0.211141	-0.164135	-0.232784	-0.151827	-0.251014	-0.11976	-0.077861	-0.233577	-0.276744	0.110167	-0.236989	-0.1308
LMSM 18	0.294288	0.280502	0.179917	0.405719	0.917033	0.234102	0.253573	0.207981	0.37866	0.247132	0.187028	0.207184	0.304747	0.266596	0.18695	0.266207	0.290811	0.25289	-0.130953	0.124713	0.182756	0.281736	0.210284	0.359809	0.359664	0.23612	0.292682	0.301604	0.232913	0.333488	0.291338	0.18732	0.223098	0.168792	0.262922	0.284719	0.310862	0.227862	0.211992	0.252115	0.225029	0.174162	0.298859	0.23522	0.203596	0.269506	0.178481	0.314527	0.249488
LMSM 19	0.406765	0.224672	0.166747	0.304177	0.348504	0.349233	0.197462	0.220028	0.27881	0.258838	0.177516	0.193871	0.390048	0.398683	0.209667	0.363636	0.293609	0.241142	-0.12963	0.279985	0.325147	0.29771	0.269818	0.2807	0.322787	0.206586	0.317781	0.197499	0.283184	0.230031	0.29814	0.234599	0.249704	0.255856	0.330358	0.270775	0.179015	0.187419	0.270028	0.295962	0.1359	0.22608	0.396095	0.307223	0.126887	0.154317	0.158738	0.316966	0.290135
LMSM 20	0.359862	0.960191	0.224178	0.331514	0.45424	0.432691	0.321209	0.132187	0.367929	0.209636	0.219695	0.343627	0.384623	0.295083	0.250601	0.43754	0.402901	0.285163	0.253257	0.394436	0.275699	0.495754	0.124875	0.364136	0.316322	0.278662	-0.119839	0.356149	0.2821	0.387656	0.358689	0.375415	0.132713	0.285641	0.486944	0.366896	0.23459	0.284422	0.260755	0.221366	0.15897	0.209616	0.386722	0.3066	0.348246	0.244004	0.287494	0.421086	0.304899
LMSM 21	0.22664	0.27644	-0.133045	0.288592	0.296692	0.255091	0.393267	0.151836	0.255764	0.194233	0.18847	0.236114	0.208186	0.201908	0.115757	0.277397	0.211663	0.224435	0.301948	0.209623	0.179252	0.212269	0.151737	0.270717	0.262211	0.136196	0.266604	0.193324	0.201387	0.276366	0.346977	0.909798	0.205083	0.133123	0.218061	0.266962	0.203177	0.245573	0.132344	0.168023	0.273351	0.103712	0.284385	0.265122	0.249771	0.258738	0.234252	0.237479	0.208124
LMSM 22	0.147464	0.32796	0.218388	0.182364	0.21288	0.221703	0.293447	0.189758	0.378918	0.23928	0.298614	0.158835	0.313141	0.218277	0.240109	0.385382	0.210963	0.229461	-0.137455	0.26931	0.286725	0.311768	0.16422	0.216872	0.293502	0.27898	0.14394	0.161891	0.125855	0.375197	0.22904	0.237714	-0.109376	0.284094	0.312095	0.321498	0.202414	0.164132	0.177714	0.179733	0.126923	0.18843	0.331559	0.174781	0.109082	0.160731	-0.177564	0.344494	0.231647
LMSM 23	0.215586	0.198785	0.222093	0.474201	0.318925	0.378159	0.246195	0.278974	0.324095	0.307511	0.220523	0.275891	0.150401	0.175521	0.370007	0.264758	0.261936	0.240502	0.198617	0.359843	0.28644	0.358577	0.232257	0.417264	0.272469	0.304406	0.334173	0.410484	0.283801	0.364645	0.281165	0.173558	0.181118	0.326836	0.344761	0.368937	0.263134	0.281841	0.229769	0.295337	0.181696	0.414532	0.282977	0.312028	0.166837	0.21975	0.29386	0.444687	0.908319
LMSM 24	-0.343401	0.205417	-0.278185	0.434564	0.295838	0.422346	0.179263	0.179238	-0.171247	0.377726	0.291132	-0.132126	0.226431	-0.236949	0.184757	-0.391079	-0.202829	-0.430286	-0.598821	0.314242	-0.299177	0.419863	0.206905	0.323567	0.330534	-0.266638	0.599475	-0.207808	0.413876	-0.402512	0.140191	0.393594	-0.403543	0.150157	0.475447	0.366065	-0.378736	0.345255	0.577494	-0.181771	0.509244	0.474503	-0.307646	0.487218	-0.560504	0.29049	-0.365542	-0.11777	-0.154727
LMSM 25	-0.0988165	0.0959872	-0.132587	0.192273	0.146924	0.222665	0.11125	-0.107139	0.180133	0.211033	0.238516	0.193766	0.129636	0.119428	0.199687	0.191871	-0.107163	0.142839	-0.139476	-0.092832	0.135841	0.126775	0.120008	0.251976	0.161085	0.19321	0.170267	-0.13756	0.0969211	0.19192	0.319575	0.238144	-0.096251	-0.11541	0.10694	0.2493	0.115034	0.100223	-0.0874792	-0.124342	-0.115942	0.137002	0.254637	0.143602	-0.163131	-0.159921	0.169265	0.278389	0.146625
LMSM 26	0.237611	0.249268	0.121497	0.213286	0.242147	0.295687	0.146927	0.197857	0.307732	0.319092	0.247496	0.798199	0.175691	0.117441	0.241796	0.221391	0.21453	0.207316	0.181488	0.184827	0.27844	0.210844	0.289921	0.332524	0.353876	0.246836	0.224364	0.262495	0.366078	0.220341	0.361077	0.143224	0.18891	0.228887	0.182631	0.366284	0.31538	0.201199	0.24277	0.187446	-0.142	0.215173	0.390096	0.204307	-0.200246	0.219141	0.162604	0.398246	0.262339
LMSM 27	0.391181	0.131803	-0.133695	0.340966	0.210243	0.278124	0.112782	0.17149	0.157242	0.375415	0.352986	0.218714	0.244487	0.249301	0.235196	0.31042	0.124697	0.151106	-0.129314	0.257399	0.125309	0.271061	0.279294	0.219275	0.181816	0.402088	0.22136	0.215305	0.220349	0.215211	0.183933	0.0976983	0.240972	0.390385	0.188325	0.221822	0.118929	0.165982	0.286339	0.278145	0.184021	0.234117	0.289042	0.245614	0.167668	0.151996	0.190787	0.324277	0.283344
LMSM 28	0.277386	0.125116	0.118406	0.311645	0.317936	0.305908	0.17246	0.196623	0.294838	0.192305	0.147318	0.136174	0.259413	0.265054	0.268547	0.265672	0.222679	0.348062	0.117991	0.239561	0.28037	0.211853	0.187266	0.375899	0.288571	0.185642	0.900546	0.183412	0.219059	0.358014	0.258003	0.2406	0.27906	0.309114	0.202067	0.251742	0.19871	0.207025	0.185398	0.189499	0.227712	0.269195	0.341069	0.191469	-0.161481	0.190524	0.189183	0.169918	0.328889
LMSM 29	0.346842	0.195741	-0.123082	0.410755	0.272729	0.426477	0.19511	0.257567	0.294549	0.292784	0.141442	0.253536	0.32372	0.265004	0.302513	0.278984	0.246118	0.208049	0.142731	0.205363	0.206464	0.283084	0.254464	0.357101	0.326171	0.318175	0.259645	0.254929	0.220388	0.297115	0.235637	0.214258	0.210012	0.414922	0.240355	0.300575	0.236923	0.264144	0.231188	0.264807	0.222698	0.317049	0.28975	0.277984	0.219041	0.215882	0.212404	0.344865	0.295497
LMSM 30	0.252871	-0.133281	-0.292826	0.164635	-0.149437	-0.161589	-0.193755	-0.174833	-0.226235	-0.11362	0.223682	-0.172268	-0.128991	0.203664	-0.165453	0.287292	-0.245218	-0.286555	-0.28434	-0.154172	-0.176839	-0.16254	-0.150272	0.123228	0.114984	0.197326	0.196157	-0.131293	-0.159667	-0.289655	-0.23382	-0.13365	0.163304	0.218402	-0.136659	-0.200792	-0.231939	-0.172115	-0.178084	-0.139951	0.183103	0.14602	0.192391	0.139199	-0.222891	-0.301056	-0.225475	0.187627	-0.271695
LMSM 31	0.232815	0.300866	0.265588	0.239976	0.322058	0.28504	0.416201	0.213616	0.269227	0.188412	0.135255	0.178174	0.109853	0.269208	0.208994	0.254623	0.333601	0.440754	0.243256	0.382198	0.308341	0.349083	0.191533	0.310243	0.283184	0.14531	0.266005	0.263274	0.294635	0.370465	0.417234	0.382913	0.248298	0.250367	0.209638	0.408577	0.257323	0.263347	0.326996	0.381666	0.26337	0.225434	0.197711	0.311259	0.152229	0.126265	0.125981	0.195333	0.374684
LMSM 32	0.289904	0.234714	0.243828	0.606528	0.410731	0.404989	0.24262	0.153686	0.248967	0.254995	0.179966	0.392021	0.294057	0.191546	0.549364	-0.130652	0.266432	0.219006	0.154505	0.312557	0.145264	0.39715	0.342642	0.59822	0.421903	0.334676	0.443407	0.472692	0.429779	0.218643	0.236077	0.210352	0.402822	0.433701	0.220534	0.351921	0.463838	0.711041	0.429941	0.129068	0.202501	0.528998	0.375673	0.416806	0.224147	0.351903	0.255332	0.505399	0.446448
LMSM 33	-0.163191	0.157935	-0.110807	0.138914	-0.130466	0.157032	0.179165	0.0794681	0.17084	0.165338	0.18666	-0.101409	-0.165702	-0.114313	-0.127001	0.22931	0.11453	0.117126	0.170685	0.118924	0.0840126	0.106673	-0.125148	0.162937	0.209346	-0.152814	0.150984	-0.15564	-0.10384	-0.140105	0.332743	0.134478	-0.0724394	0.14899	-0.0946622	-0.134275	0.227954	-0.141366	-0.114956	-0.152722	0.109003	-0.228214	-0.180639	0.143242	-0.123979	0.201365	0.110709	0.179205	-0.10604
LMSM 34	0.484628	0.199846	-0.122017	0.421936	0.260023	0.453854	0.184447	0.229624	0.279208	0.258533	0.144562	0.341139	0.37648	0.255421	0.201971	0.360109	0.257995	0.222121	0.148685	0.285674	0.2281	0.385154	0.317757	0.347865	0.313143	0.30569	0.35746	0.275238	0.276179	0.195279	0.328634	-0.123944	0.262165	0.324539	0.380216	0.257389	0.249696	0.301032	0.363701	0.3192	0.160796	0.330328	0.348299	0.316872	-0.111661	0.191912	0.187411	0.303477	0.288396
LMSM 35	0.214952	0.247313	0.20988	0.302124	0.300355	0.334183	0.306058	0.185573	0.287579	0.175248	0.141106	0.295705	0.194624	0.0923863	0.335733	0.246561	0.326526	0.397939	0.221093	0.22929	0.310366	0.294692	0.23406	0.374917	0.376622	0.209054	0.256346	0.300012	0.297721	0.304309	0.444672	0.351568	0.128031	0.289835	0.270378	0.933593	0.307757	0.203079	0.282919	0.295955	0.192705	0.230991	0.346427	0.27322	-0.118224	0.151543	0.178514	0.342823	0.312641
LMSM 36	0.412785	0.122105	0.111349	0.315487	0.297124	0.318867	-0.0940677	0.237277	0.20272	0.287904	0.271667	0.266734	0.937108	0.402156	0.27725	0.396455	0.17274	0.159012	-0.177592	0.213177	0.167419	0.298136	0.2404	0.22339	0.263904	0.318784	0.361554	-0.109967	0.261184	0.273978	0.20869	0.24369	0.265636	0.339077	0.264131	0.248682	0.255608	0.218789	0.144519	0.285967	0.231383	0.280758	0.456528	0.250833	0.0999541	0.309636	0.217361	0.252061	0.192569
LMSM 37	-0.322615	0.220007	-0.210547	-0.227172	-0.200199	0.424388	0.212848	-0.136492	-0.319335	-0.248736	0.313112	0.510391	0.302632	-0.282463	0.412035	-0.276916	0.339253	0.326787	0.290435	-0.275403	-0.429232	0.274038	0.153392	-0.466298	-0.277889	-0.165521	0.565574	-0.252936	0.465779	0.525342	0.606193	0.450881	0.287061	0.508053	-0.210865	0.516346	-0.324826	0.381327	-0.415685	0.148216	0.470017	0.327291	0.311546	0.362088	-0.270756	0.216244	0.569475	0.200887	0.176696
LMSM 38	0.230102	0.256514	0.171471	0.930506	0.395518	0.348446	0.313074	0.268234	0.299379	0.248709	0.204508	0.23841	0.215148	0.157247	0.311793	0.227253	0.215366	0.243062	0.131677	0.198589	0.211747	0.339113	0.259541	0.426846	0.294455	0.314064	0.360596	0.350732	0.285813	0.204247	0.345715	0.22417	0.248055	0.320076	0.243566	0.349193	0.250469	0.35804	0.287758	0.308807	0.250405	0.373566	0.346295	0.345055	0.176917	0.420322	0.182928	0.356374	0.363112
LMSM 39	0.236374	0.20354	0.147096	0.379626	0.303346	0.359048	0.129537	0.229867	0.409754	0.339709	0.198916	0.338787	0.232347	0.1631	0.457054	0.290704	0.283101	0.277255	0.117788	0.274596	0.272385	0.273064	0.324021	0.41366	0.318602	0.325475	0.218595	0.316393	0.368505	0.435044	0.443471	0.230369	0.133543	0.306739	0.334463	0.337551	0.184012	0.203513	0.286266	0.290562	0.112474	0.300583	0.331681	0.286458	0.335779	0.197416	0.237614	0.925801	0.389222
LMSM 40	0.205111	-0.31159	-0.205831	-0.12822	0.18678	0.173436	-0.259483	0.131485	0.179324	0.150035	-0.148454	-0.206765	-0.242126	0.114978	-0.159743	0.206457	-0.178375	-0.277894	-0.174211	-0.145743	-0.133786	-0.115882	-0.14165	-0.218794	-0.139999	0.193026	-0.216251	-0.184432	-0.141892	-0.227162	-0.11467	-0.260312	-0.126265	0.146531	0.244028	-0.186993	-0.182065	-0.29205	-0.135714	0.111043	-0.158506	-0.122057	-0.118157	-0.187151	0.156584	-0.158898	-0.141177	-0.171076	0.128333
LMSM 41	0.16232	0.157925	0.165045	0.212701	0.304876	0.190772	0.183483	0.15617	0.396371	0.195012	0.210065	0.166784	0.126534	0.133437	-0.125763	0.281189	0.130085	-0.173136	0.230845	0.160329	-0.107854	0.128321	0.151083	0.447937	0.11348	0.172326	-0.103918	0.114954	0.152844	-0.157019	0.225819	0.165105	0.123108	0.149196	-0.13969	0.112107	0.292421	0.277663	0.170981	0.103398	0.138688	0.150842	0.205595	-0.101077	0.363139	0.26387	0.259901	0.32308	0.231325
LMSM 42	-0.117375	-0.203653	-0.15267	0.154685	-0.187725	-0.181818	-0.206898	-0.246119	-0.216014	-0.140284	0.130386	-0.252285	-0.167466	-0.155608	0.138317	-0.142444	-0.204742	-0.147426	-0.257272	-0.222584	-0.294203	-0.235646	-0.169527	-0.127053	-0.28178	0.136738	-0.118049	-0.183505	-0.257769	-0.165312	-0.150902	-0.217421	-0.195496	-0.229671	-0.190773	-0.162314	-0.23292	-0.260137	-0.151019	-0.199646	-0.190222	-0.114388	-0.159527	-0.184717	-0.2072	-0.21932	-0.203307	-0.12269	-0.248058
LMSM 43	-0.134145	-0.113529	-0.116755	-0.147376	-0.140436	-0.145986	0.145403	0.118257	-0.172498	-0.102877	0.208253	-0.223075	-0.111614	-0.168878	-0.213322	0.138827	-0.192668	-0.219177	-0.202444	-0.182905	-0.17155	0.0935246	-0.203736	-0.11144	-0.154145	0.142831	-0.126506	-0.140102	-0.261138	-0.221078	0.140786	0.151235	0.088486	-0.190334	-0.235923	-0.180935	-0.170679	-0.167602	-0.190021	-0.184248	-0.10157	-0.237759	-0.119625	-0.186671	0.110807	-0.109004	-0.132037	-0.21723	-0.197267
LMSM 44	0.0911199	-0.180124	-0.136539	0.140537	0.10385	0.118095	0.169399	0.147222	-0.113994	0.120077	-0.0975669	-0.236155	-0.132623	0.0736924	-0.164735	-0.114979	-0.0791889	-0.166396	0.138249	-0.177959	-0.150365	-0.142214	-0.210955	0.138471	0.0738539	-0.160001	0.16159	-0.18907	-0.109054	0.132151	0.165261	-0.134417	0.108753	-0.182921	-0.120759	-0.160818	-0.143284	-0.164577	-0.139489	-0.193618	0.219767	-0.172549	-0.0946832	0.0804557	0.228832	0.134865	0.152376	-0.144961	-0.161596
LMSM 45	0.305221	0.290456	0.241635	0.232807	0.392293	0.381075	0.304235	0.281153	0.293738	0.202464	0.250302	0.302953	0.183085	0.284337	0.290221	0.155993	0.232307	0.355366	0.237948	0.33027	0.254893	0.254761	0.26123	0.260972	0.236936	0.34302	0.187779	0.386117	0.245163	0.350582	0.340217	0.286976	0.206217	0.297984	0.224951	0.352697	0.236702	0.20884	0.191497	0.324416	0.313745	0.257285	0.314376	0.299699	0.334526	0.249063	0.328091	0.392024	0.321869
LMSM 46	0.375169	0.249498	0.123316	0.310194	0.298789	0.268531	0.15164	0.297466	0.293231	0.28615	0.246854	0.328796	0.396194	0.277288	0.317548	0.351367	0.241966	0.188007	0.139521	0.24616	0.236766	0.314836	0.285516	0.311755	0.256165	0.335198	0.329661	0.253118	0.201058	0.303141	0.290816	0.250446	0.244843	0.375151	0.286134	0.360974	0.254935	0.239292	0.191015	0.237296	0.176094	0.277417	0.883785	0.319285	0.155895	0.268608	0.208077	0.313201	0.243954
LMSM 47	0.203444	-0.218121	-0.23364	0.127643	-0.125284	0.267215	-0.145487	-0.140093	0.154021	0.0945164	0.199094	-0.11192	0.20789	0.22016	0.170724	0.288353	-0.267985	-0.192304	-0.2224	-0.203976	0.0972552	-0.120539	0.137341	0.114302	-0.138607	-0.135308	0.1984	-0.237023	-0.21805	0.152914	0.159297	0.130134	0.104754	0.226229	-0.136952	0.164084	-0.251235	-0.181929	-0.161025	-0.138979	0.122062	-0.111662	0.254088	-0.135268	-0.275857	-0.229037	-0.196718	0.159179	-0.18126
LMSM 48	0.312903	0.213527	0.120048	0.427149	0.317028	0.409137	0.20942	0.229962	0.309285	0.260503	0.153435	0.30192	0.320825	0.178047	0.398779	0.285285	0.231803	0.17707	0.119807	0.218107	0.228637	0.317052	0.351527	0.390952	0.258101	0.323332	0.326153	0.359391	0.297683	0.347011	0.315077	0.179246	0.258669	0.42004	0.216053	0.409041	0.202265	0.286835	0.261298	0.192494	0.187378	0.380755	0.327216	0.303749	0.172075	0.251344	0.261592	0.447519	0.367321
LMSM 49	0.250809	0.292275	0.239358	0.262421	0.238275	0.284986	0.151445	0.196181	0.247846	0.20058	0.206265	0.276632	0.320534	0.215346	0.28806	0.272284	0.243954	0.190412	-0.118045	0.169858	0.171102	0.236296	0.260625	0.385469	0.305279	0.18317	0.2923	0.297557	0.3223	0.224938	0.262701	0.28522	0.238657	0.279163	0.260328	0.319078	0.261512	0.221864	0.223105	0.17903	0.150128	0.25834	0.343586	0.340125	-0.130858	0.202606	0.12119	0.313635	0.155715
LMSM 50	0.256338	0.318724	-0.086738	0.272062	0.254565	0.491224	0.21254	0.246756	0.318893	0.336975	0.240517	0.340893	0.238747	0.238329	0.255615	0.444415	0.253681	0.184224	-0.141168	0.339312	0.253255	0.392299	0.308723	0.322157	0.209809	0.367332	0.157933	0.358887	0.251773	0.263942	0.235289	0.193279	0.162921	0.41176	0.368773	0.384092	-0.121015	0.169685	0.210449	0.233408	-0.167241	0.150422	0.370117	0.172625	0.214664	0.164184	0.254888	0.424159	0.334134
LMSM 51	0.24703	0.185778	-0.337089	0.296803	0.45787	0.234286	0.39651	0.232872	0.366625	0.330093	0.288505	0.16879	0.188206	0.266625	0.233246	0.281463	0.333646	0.192072	0.23312	0.267644	0.162988	0.309824	-0.146569	0.241455	0.16278	0.218912	0.46312	0.25509	-0.199226	0.40042	0.191393	-0.22154	0.380859	0.193582	0.226968	-0.27833	-0.160423	0.225823	0.18643	-0.159515	0.634543	0.210887	0.231995	0.289837	0.472531	0.554148	0.403134	0.211457	0.190657
[truncated: 451 more columns]
